# Supplementary material
Source: HighWire-hosted journal article supplement (https://bmjopen.bmj.com/content/10/1/e034090)
Supplement: inline-supplementary-material-1 [file inline-supplementary-material-1.pdf]

### **List of the Institutional Review Board at each site**

The study protocol is approved by the Institutional Review Board of Asan Medical Center, Hanyang University Seoul Hospital, Hallym University Kangnam Sacred Heart Hospital, Gangneung Asan Hospital, Kangwon National University Hospital, Konkuk University Hospital, Gyeongsang National University Hospital, Hanyang University Guri Hospital, National Cancer Center, National Medical Center, Dong-a University Hospital, Seoul Metropolitan Government-Seoul National University Boramae Medical Center, CHA Bundang Medical Center, Seoul National University Bundang Hospital, Samsung Medical Center, Seoul National University Hospital, Catholic University Seoul St. Mary's Hospital, Catholic University St. Paul's Hospital, Soonchunhyang University Cheonan Hospital, Soonchunhyang University Bucheon Hospital, Yonsei University Severance Hospital, Ulsan University Hospital, Wonju Severance Christian Hospital, Jeju National University Hospital, Hallym University Chuncheon Sacred Heart Hospital, Inje University Haeundae Paik Hospital.
